# Supplementary material for: The saturation vapor pressures of higher-order polyethylene glycols and achieving a wide calibration range for volatility measurements by FIGAERO-CIMS
Source: Copernicus journal article supplement (doi:10.5194/egusphere-2025-2219), 2025-06-02
Supplement: Supplementary file 1 [file egusphere-2025-2219-supplement.pdf]

## S1 Conformer selection for COSMOtherm calculations

Due to memory limitations, it is not possible to include all of the conformers in COSMOtherm calculations. The selection of the correct conformers is critical, because different types of conformers can lead to several orders of magnitude variation in the estimated saturation vapor pressures (Kurtén et al., 2018; Li et al., 2023a). Previous studies have shown that conformers that are able to interact with the surrounding solution are energetically more favourable in the condensed phase than conformers containing intramolecular hydrogen bonds (Hytinen & Prisle, 2020). In order to find the best agreement between our calculations and previous experiments, we tested multiple ways of selecting conformers to the calculation. First, we found a set of conformers using systematic conformer sampling and Merck molecular force field in the Spartan 20 program (Wavefunction Inc.). Because the large PEGs are flexible and have millions of possible conformers, we used the sparse systematic algorithm and limited the search to a small number of conformers. The number of searched conformers was reduced for the larger molecules, in order to keep the computational cost of the calculations manageable. Additionally, the maximum number of searched conformers in the Spartan program is  $2^{30}$  (i.e., 2-fold rotations of 30 bonds) or  $3^{19}$  (i.e., 3-fold rotations of 19 bonds). We therefore used only 2-fold torsions for the PEG- 6 to 14 and only the maximum 30 2-fold torsions were selected for PEG-12 and PEG-14. Table S1 shows the numbers of searched and found conformers for each of the PEG.

**Table S1 - Conformer sampling details.**

| n       | # conformers searched | # conformers found     |
|---------|-----------------------|------------------------|
| 5       | all                   | 21 891                 |
| 6, 7, 8 | 20 000                | 14 293, 11 811, 12 491 |
| 10      | 10 000                | 6 349                  |
| 12      | 5 000                 | 3 403                  |
| 14      | 1 000                 | 674                    |

All found conformer were optimized at the BP/def-TZVP level of theory using the TURBOMOLE program (TURBOMOLE, 2019). After the geometry optimization, duplicate conformers were removed with the CLUSTER\_GEOCHECK algorithm of the COSMOconf program (BIOVIA - COSMOconf). Conformers with similar chemical potentials were omitted using the CLUSTER\_MU algorithm. Additional higher-level single-point calculations were run at the BP/def2-TZVPD-FINE level of theory. The geometries of the chosen conformers were optimized at the BP/def-TZVP level of theory (gas phase) and the final gas-phase energies were calculated at the BP/def2-TZVPD level of theory.

The best agreement between experimental K2018 and COSMO-RS-derived saturation vapor pressures was found using the lowest pure compound chemical potentials calculated using the BP\_TZVPD\_FINE\_21 parametrization. Using different

30 numbers of conformers in the COSMO*therm* calculations of PEGs 5-8 showed that the optimal conformer set contains all (up to 40) conformers that have negative pure compound chemical potentials (estimated using the BP\_TZVPD\_FINE-21 parametrization). For PEG-5 and PEG-6, only 4 and 2 conformers, respectively, remained after the removal of conformers with similar chemical potentials. Originally, 51 and 9 conformers with negative chemical potentials were found for PEG-5 and PEG-6, respectively. In order to have a sufficient number of conformers in the COSMO*therm* calculation, we included all conformers with negative chemical potentials in the pure compound (40 and 9) of PEG-5 and PEG-6.

35 The newer BP\_TZVPD\_FINE\_21 parametrization gives between 1 to 3 orders of magnitude lower saturation vapor pressure estimates than the previous BP\_TZVPD\_FINE\_20 parametrization. Better agreement with experiments was found using the BP\_TZVPD\_FINE\_20 parametrization. The difference in the  $P_{sat}$  estimates is caused by differences in the chemical potentials between the two parametrizations. For example, the lowest chemical potential conformer has up to 2.4 kcal/mol higher chemical potential (and consequently condensed-phase free energy) in the BP\_TZVPD\_FINE\_20 than in the BP\_TZVPD\_FINE\_21 parametrization among the studied PEGs. The BP\_TZVPD\_FINE\_21 parametrization gives 40 systematically a wider range in chemical potentials than the previous BP\_TZVPD\_FINE\_20 parametrization. This indicates that the new parametrization finds larger effects from structural differences, such as intramolecular hydrogen bonds, on the intermolecular interaction. Since the parametrization of COSMO*therm* has no effect on the gas-phase energy, the change in chemical potential is seen directly in the saturation vapor pressure value.

45

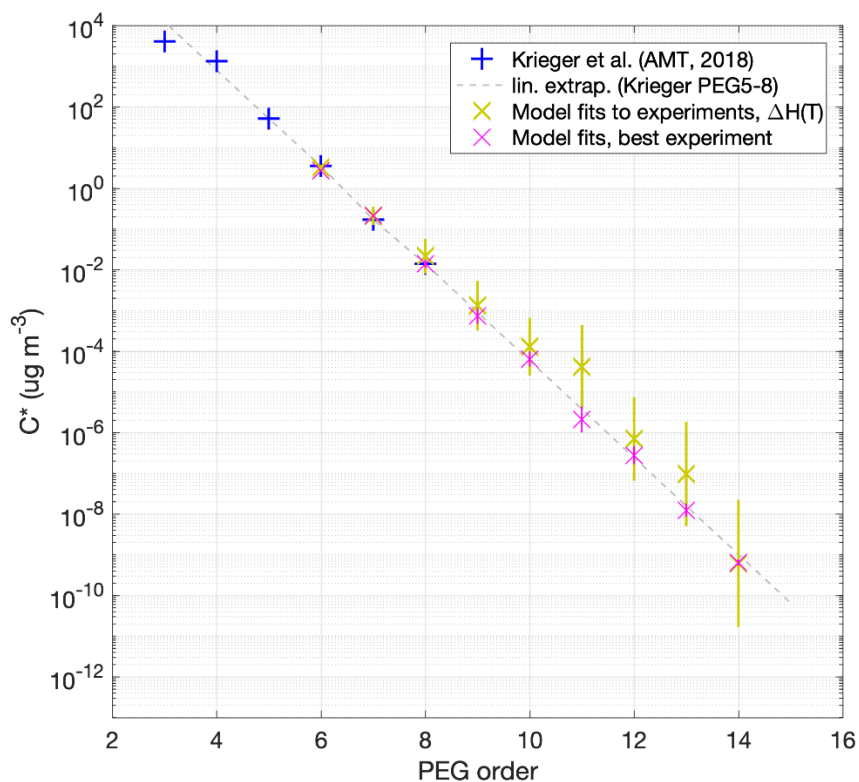

**Figure S1:** A more detailed look at the desorption model results for saturation vapor concentration at 298 K ( $C^*$ , in units of  $\mu\text{g m}^{-3}$ ) as a function of PEG order (which is also directly proportional to mass). For reference, blue pluses are conversions from saturation vapor pressures reported in Krieger et al., (2018) for PEGs 3-8; the grey dashed line is an extrapolated linear fit to their values for PEGs 5-8. Yellow crosses are our results for PEGs 6-14, with uncertainties as vertical lines, from fitting the desorption model to a representative selection of three FIGAERO-CIMS experiments (as discussed in the main text and shown in Figs. 1 and 3). Magenta crosses, also with uncertainties as vertical lines, are the results for the best-fitting experiment (described as “Experiment A” in the main text).

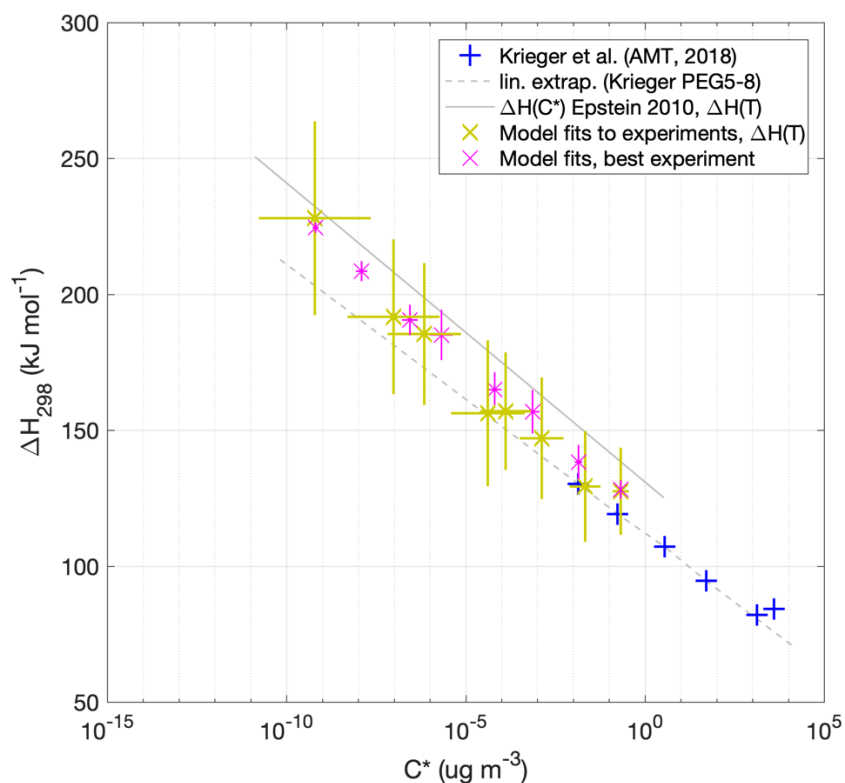

55

**Figure S2:** Vaporization enthalpies  $\Delta H$  vs. saturation vapour concentrations  $C^*$ , at 298 K, using the same datasets and colour coding as in Fig. S1: based on literature (blue crosses) for PEGs 3-8, and desorption model fits to measurement results in this study for PEGs 7-14 (yellow and magenta crosses, with lines representing uncertainties as discussed in the main text). The grey dashed line indicates a log-linear extrapolation of previously measured  $C^*$  and  $\Delta H$  (PEG5-8; Krieger et al., 2018) up to higher-order PEGs. The solid grey line indicates the empirical relationship  $\Delta H_{298} [\text{kJ mol}^{-1}] = 131 - 11 \log_{10}(C^*_{298} [\mu\text{g m}^{-3}])$  proposed by Epstein et al., (2010) based on literature of Antoine coefficients for 821 organic compounds (not including PEGs, except PEG-2).

60

**Table S2: Measured or estimated  $P_{sat}$  values in units of Pa from all introduced measurements and models. The abbreviations used for the methods are explained in the main text (Section 2.3). Two values printed in bold (PEG-9 for K2018, PEG-15 for the desorption model) are estimated based on a log-linear extrapolation of the results for lower-order PEGs. The last row (linear fit) refers to results shown by the dashed line in Fig. 2a.**

| Method              | PEG<br>-5                 | PEG-6                                         | PEG-7                                         | PEG-8                                         | PEG-9                                          | PEG-10                                          | PEG-11                                         | PEG-12                                          | PEG-13                                          | PEG-<br>14                                    | PEG-15                                                            |
|---------------------|---------------------------|-----------------------------------------------|-----------------------------------------------|-----------------------------------------------|------------------------------------------------|-------------------------------------------------|------------------------------------------------|-------------------------------------------------|-------------------------------------------------|-----------------------------------------------|-------------------------------------------------------------------|
| K2018               | 5.29<br>$\times 10^{-4}$  | 3.05<br>$\times 10^{-5}$                      | 1.29<br>$\times 10^{-6}$                      | 9.2<br>$\times 10^{-8}$                       | <b>3.9</b><br>$\times 10^{-9}$                 |                                                 |                                                |                                                 |                                                 |                                               |                                                                   |
| L2023               |                           | 2.24<br>$\times 10^{-5}$                      | 1.06<br>$\times 10^{-6}$                      | 6.51<br>$\times 10^{-8}$                      | 6.71<br>$\times 10^{-9}$                       |                                                 |                                                |                                                 |                                                 |                                               |                                                                   |
| Desorption<br>model |                           | $2.836^{+0.518}_{-0.438}$<br>$\times 10^{-5}$ | $1.603^{+1.092}_{-0.649}$<br>$\times 10^{-6}$ | $1.435^{+2.432}_{-0.903}$<br>$\times 10^{-7}$ | $7.895^{+24.397}_{-5.965}$<br>$\times 10^{-9}$ | $7.003^{+28.873}_{-5.636}$<br>$\times 10^{-10}$ | $2.04^{+19.682}_{-1.848}$<br>$\times 10^{-10}$ | $3.166^{+30.225}_{-2.865}$<br>$\times 10^{-12}$ | $4.066^{+73.924}_{-3.854}$<br>$\times 10^{-13}$ | $2.34^{+85.13}_{-2.334}$<br>$\times 10^{-15}$ | <b><math>1.262^{+4.2419}_{-1.223}</math></b><br>$\times 10^{-15}$ |
| COSMOtherm          | 5.3<br>$\times 10^{-4}$   | 5.47<br>$\times 10^{-5}$                      |                                               | 1.12<br>$\times 10^{-7}$                      |                                                | 9.38<br>$\times 10^{-10}$                       |                                                | 8.73<br>$\times 10^{-12}$                       |                                                 | 6.41<br>$\times 10^{-13}$                     |                                                                   |
| MGM                 | 2<br>$\times 10^{-4}$     | 2.28<br>$\times 10^{-5}$                      | 1.91<br>$\times 10^{-6}$                      | 1.5<br>$\times 10^{-7}$                       | 1.19<br>$\times 10^{-8}$                       | 8.97<br>$\times 10^{-10}$                       | 6.55<br>$\times 10^{-11}$                      | 4.65<br>$\times 10^{-12}$                       | 3.21<br>$\times 10^{-13}$                       | 2.16<br>$\times 10^{-14}$                     | 1.42<br>$\times 10^{-15}$                                         |
| EVAPORATIO<br>N     | 3.634<br>$\times 10^{-5}$ | 1.268<br>$\times 10^{-6}$                     | 4.43<br>$\times 10^{-8}$                      | 1.548<br>$\times 10^{-9}$                     | 5.413<br>$\times 10^{-11}$                     | 1.893<br>$\times 10^{-12}$                      | 6.616<br>$\times 10^{-14}$                     | 2.312<br>$\times 10^{-15}$                      | 8.084<br>$\times 10^{-17}$                      | 2.826<br>$\times 10^{-18}$                    | 9.879<br>$\times 10^{-20}$                                        |

|                            |                           |                           |                            |                            |                            |                            |                            |                            |                            |                            |                            |
|----------------------------|---------------------------|---------------------------|----------------------------|----------------------------|----------------------------|----------------------------|----------------------------|----------------------------|----------------------------|----------------------------|----------------------------|
| <b>SIMPOL</b>              | 1.276<br>$\times 10^{-5}$ | 3.204<br>$\times 10^{-7}$ | 8.048<br>$\times 10^{-9}$  | 8.049<br>$\times 10^{-10}$ | 5.078<br>$\times 10^{-12}$ | 1.305<br>$\times 10^{-13}$ | 3.355<br>$\times 10^{-15}$ | 8.428<br>$\times 10^{-17}$ | 2.167<br>$\times 10^{-18}$ | 5.444<br>$\times 10^{-20}$ | 1.399<br>$\times 10^{-21}$ |
| <b>M2019</b>               | 1.559<br>$\times 10^{-6}$ | 5.783<br>$\times 10^{-9}$ | 2.212<br>$\times 10^{-11}$ | 8.651<br>$\times 10^{-14}$ | 3.441<br>$\times 10^{-16}$ | 1.388<br>$\times 10^{-18}$ | 5.66<br>$\times 10^{-21}$  | 2.329<br>$\times 10^{-23}$ | 9.661<br>$\times 10^{-26}$ | 4.035<br>$\times 10^{-28}$ | 1.695<br>$\times 10^{-30}$ |
| <b>S2018,<br/>monomers</b> | 9.824<br>$\times 10^{-5}$ | 9.359<br>$\times 10^{-7}$ | 9.124<br>$\times 10^{-9}$  | 9.05<br>$\times 10^{-11}$  | 9.099<br>$\times 10^{-13}$ | 9.247<br>$\times 10^{-15}$ | 9.483<br>$\times 10^{-17}$ | 9.796<br>$\times 10^{-19}$ | 1.018<br>$\times 10^{-20}$ | 1.064<br>$\times 10^{-22}$ | 1.118<br>$\times 10^{-24}$ |
| <b>S2018,<br/>dimers</b>   | 2.357<br>$\times 10^{-3}$ | 3.813<br>$\times 10^{-5}$ | 6.312<br>$\times 10^{-7}$  | 1.063<br>$\times 10^{-8}$  | 1.815<br>$\times 10^{-10}$ | 3.134<br>$\times 10^{-12}$ | 5.457<br>$\times 10^{-14}$ | 9.574<br>$\times 10^{-16}$ | 1.693<br>$\times 10^{-17}$ | 3<br>$\times 10^{-19}$     | 5.351<br>$\times 10^{-21}$ |
| <b>L2016</b>               | 3.953<br>$\times 10^{-4}$ | 1.039<br>$\times 10^{-5}$ | 2.786<br>$\times 10^{-7}$  | 7.59<br>$\times 10^{-9}$   | 2.093<br>$\times 10^{-10}$ | 5.833<br>$\times 10^{-12}$ | 1.639<br>$\times 10^{-13}$ | 4.635<br>$\times 10^{-15}$ | 1.32<br>$\times 10^{-16}$  | 3.774<br>$\times 10^{-18}$ | 1.084<br>$\times 10^{-19}$ |
| <b>P2020</b>               | 3.609<br>$\times 10^{-6}$ | 8.012<br>$\times 10^{-7}$ | 1.823<br>$\times 10^{-7}$  | 4.225<br>$\times 10^{-8}$  | 9.931<br>$\times 10^{-9}$  | 2.361<br>$\times 10^{-9}$  | 5.667<br>$\times 10^{-10}$ | 1.371<br>$\times 10^{-10}$ | 3.335<br>$\times 10^{-11}$ | 8.164<br>$\times 10^{-12}$ | 2.008<br>$\times 10^{-12}$ |
| <b>Linear fit</b>          | 5.287<br>$\times 10^{-4}$ | 2.677<br>$\times 10^{-5}$ | 1.39<br>$\times 10^{-6}$   | 7.344<br>$\times 10^{-8}$  | 3.938<br>$\times 10^{-9}$  | 2.136<br>$\times 10^{-10}$ | 1.17<br>$\times 10^{-11}$  | 6.449<br>$\times 10^{-13}$ | 3.58<br>$\times 10^{-14}$  | 1.999<br>$\times 10^{-15}$ | 1.121<br>$\times 10^{-16}$ |

75

**Table S3. Measured or estimated  $C^*$  values in units of  $\mu\text{g m}^{-3}$  from all introduced measurements and models. The abbreviations used for the methods are explained in the main text (Section 2.3). Two values printed in bold (PEG-9 for K2018, PEG-15 for the desorption model) are estimated based on a log-linear extrapolation of the results for lower-order PEGs. The last row (linear fit) refers to results shown by the dashed line in Fig. 2a.**

| Method           | PEG-5      | PEG-6                    | PEG-7                     | PEG-8                                         | PEG-9                                         | PEG-10                                        | PEG-11                                         | PEG-12                                         | PEG-13                                          | PEG-14                                           | PEG-15                                                             |
|------------------|------------|--------------------------|---------------------------|-----------------------------------------------|-----------------------------------------------|-----------------------------------------------|------------------------------------------------|------------------------------------------------|-------------------------------------------------|--------------------------------------------------|--------------------------------------------------------------------|
| K2018            | 50.81<br>8 | 3.471                    | 0.169                     | 1.374<br>$\times 10^{-2}$                     | <b>6.517</b><br>$\times 10^{-4}$              |                                               |                                                |                                                |                                                 |                                                  |                                                                    |
| L2023            |            | 2.607                    | 0.138                     | 9.364<br>$\times 10^{-3}$                     | 8.94<br>$\times 10^{-4}$                      |                                               |                                                |                                                |                                                 |                                                  |                                                                    |
| Desorption model |            | $3.22^{+0.589}_{-0.498}$ | $0.211^{+0.144}_{-0.085}$ | $2.143^{+3.632}_{-1.348}$<br>$\times 10^{-2}$ | $1.319^{+4.076}_{-0.997}$<br>$\times 10^{-3}$ | $1.294^{+5.337}_{-1.042}$<br>$\times 10^{-4}$ | $4.132^{+39.882}_{-3.744}$<br>$\times 10^{-5}$ | $6.976^{+66.611}_{-6.315}$<br>$\times 10^{-7}$ | $9.684^{+176.047}_{-9.178}$<br>$\times 10^{-8}$ | $6.141^{+217.853}_{-5.972}$<br>$\times 10^{-10}$ | <b><math>3.446^{+116.087}_{-3.347}</math></b><br>$\times 10^{-10}$ |
| COSMOtherm       | 50.91<br>4 | 6.226                    |                           | 1.673<br>$\times 10^{-2}$                     |                                               | 1.734<br>$\times 10^{-4}$                     |                                                | 1.924<br>$\times 10^{-6}$                      |                                                 | 1.641<br>$\times 10^{-7}$                        |                                                                    |
| MGM              | 19.21<br>3 | 2.595                    | 0.251                     | 2.24<br>$\times 10^{-2}$                      | 1.989<br>$\times 10^{-3}$                     | 1.658<br>$\times 10^{-4}$                     | 1.327<br>$\times 10^{-5}$                      | 1.025<br>$\times 10^{-6}$                      | 7.645<br>$\times 10^{-8}$                       | 5.528<br>$\times 10^{-9}$                        | 3.886<br>$\times 10^{-10}$                                         |
| EVAPORATION      | 3.482      | 0.144                    | 5.829<br>$\times 10^{-3}$ | 2.312<br>$\times 10^{-4}$                     | 9.045<br>$\times 10^{-6}$                     | 3.449<br>$\times 10^{-7}$                     | 1.341<br>$\times 10^{-8}$                      | 5.096<br>$\times 10^{-10}$                     | 1.925<br>$\times 10^{-11}$                      | 7.232<br>$\times 10^{-13}$                       | 2.704<br>$\times 10^{-14}$                                         |

|                                     |            |                           |                           |                           |                            |                            |                            |                            |                            |                            |                            |
|-------------------------------------|------------|---------------------------|---------------------------|---------------------------|----------------------------|----------------------------|----------------------------|----------------------------|----------------------------|----------------------------|----------------------------|
| <b>SIMPOL</b>                       | 1.225      | 3.647<br>$\times 10^{-2}$ | 1.059<br>$\times 10^{-3}$ | 1.202<br>$\times 10^{-4}$ | 8.486<br>$\times 10^{-7}$  | 2.413<br>$\times 10^{-8}$  | 6.798<br>$\times 10^{-10}$ | 1.857<br>$\times 10^{-11}$ | 5.159<br>$\times 10^{-13}$ | 1.393<br>$\times 10^{-14}$ | 3.828<br>$\times 10^{-16}$ |
| <b>M2019</b>                        | 0.15       | 6.563<br>$\times 10^{-4}$ | 2.911<br>$\times 10^{-6}$ | 1.292<br>$\times 10^{-8}$ | 5.751<br>$\times 10^{-11}$ | 2.566<br>$\times 10^{-13}$ | 1.147<br>$\times 10^{-15}$ | 5.133<br>$\times 10^{-18}$ | 2.3<br>$\times 10^{-20}$   | 1.033<br>$\times 10^{-22}$ | 4.639<br>$\times 10^{-25}$ |
| <b>S2018,<br/>monomers</b>          | 9.437      | 0.107                     | 1.201<br>$\times 10^{-3}$ | 1.352<br>$\times 10^{-5}$ | 1.521<br>$\times 10^{-7}$  | 1.71<br>$\times 10^{-9}$   | 1.922<br>$\times 10^{-11}$ | 2.16<br>$\times 10^{-13}$  | 2.427<br>$\times 10^{-15}$ | 2.725<br>$\times 10^{-17}$ | 3.06<br>$\times 10^{-19}$  |
| <b>S2018, dimers</b>                | 226.4      | 4.34                      | 8.306<br>$\times 10^{-2}$ | 1.588<br>$\times 10^{-3}$ | 3.034<br>$\times 10^{-5}$  | 5.793<br>$\times 10^{-7}$  | 1.106<br>$\times 10^{-8}$  | 2.11<br>$\times 10^{-10}$  | 4.025<br>$\times 10^{-12}$ | 7.678<br>$\times 10^{-14}$ | 1.464<br>$\times 10^{-15}$ |
| <b>L2016</b>                        | 37.97<br>1 | 1.182                     | 3.666<br>$\times 10^{-2}$ | 1.134<br>$\times 10^{-3}$ | 3.498<br>$\times 10^{-5}$  | 1.078<br>$\times 10^{-6}$  | 3.32<br>$\times 10^{-8}$   | 1.022<br>$\times 10^{-9}$  | 3.142<br>$\times 10^{-11}$ | 9.657<br>$\times 10^{-13}$ | 2.967<br>$\times 10^{-14}$ |
| <b>P2020</b>                        | 0.347      | 9.12<br>$\times 10^{-2}$  | 2.398<br>$\times 10^{-2}$ | 6.3<br>$\times 10^{-3}$   | 1.659<br>$\times 10^{-3}$  | 4.365<br>$\times 10^{-4}$  | 1.148<br>$\times 10^{-4}$  | 3.02<br>$\times 10^{-5}$   | 7.943<br>$\times 10^{-6}$  | 2.089<br>$\times 10^{-6}$  | 5.495<br>$\times 10^{-7}$  |
| <b>Linear fit to<br/>PEG-number</b> | 50.78<br>7 | 3.048                     | 0.1828                    | 1.097<br>$\times 10^{-2}$ | 6.581<br>$\times 10^{-4}$  | 3.948<br>$\times 10^{-5}$  | 2.368<br>$\times 10^{-6}$  | 1.421<br>$\times 10^{-7}$  | 8.526<br>$\times 10^{-9}$  | 5.115<br>$\times 10^{-10}$ | 3.069<br>$\times 10^{-11}$ |



80 **Table S4: Desorption model-derived values for vaporization enthalpy  $\Delta H$  in units of  $\text{kJ mol}^{-1}$ , including uncertainties.**

|            | PEG-7                   | PEG-8                   | PEG-9                   | PEG-10                 | PEG-11                  | PEG-12                  | PEG-13                  | PEG-14                 |
|------------|-------------------------|-------------------------|-------------------------|------------------------|-------------------------|-------------------------|-------------------------|------------------------|
| $\Delta H$ | 127.553 $\pm$<br>16.022 | 129.312 $\pm$<br>20.383 | 147.042 $\pm$<br>22.366 | 157.032 $\pm$<br>21.67 | 156.265 $\pm$<br>26.843 | 185.414 $\pm$<br>26.096 | 191.754 $\pm$<br>28.463 | 228.01 $\pm$<br>35.661 |

References

85 Epstein, S. A., Riipinen, I., & Donahue, N. M. (2010). A semiempirical correlation between enthalpy of vaporization and saturation concentration for organic aerosol. *Environmental Science and Technology*, 44(2), 743–748. [https://doi.org/10.1021/ES902497Z/SUPPL\\_FILE/ES902497Z\\_SI\\_001.PDF](https://doi.org/10.1021/ES902497Z/SUPPL_FILE/ES902497Z_SI_001.PDF)

Hyttinen, N., & Prisle, N. L. (2020). Improving Solubility and Activity Estimates of Multifunctional Atmospheric Organics by Selecting Conformers in COSMO therm. *Journal of Physical Chemistry A*, 124(23), 4801–4812. [https://doi.org/10.1021/ACS.JPCA.0C04285/ASSET/IMAGES/LARGE/JP0C04285\\_0002.JPEG](https://doi.org/10.1021/ACS.JPCA.0C04285/ASSET/IMAGES/LARGE/JP0C04285_0002.JPEG)

90 *KIT - SCC - Dienste - Softwarekatalog - TURBOMOLE*. Retrieved April 8, 2025, from <https://www.scc.kit.edu/produkte/turbomole.php>

Krieger, U. K., Siegrist, F., Marcolli, C., Emanuelsson, E. U., Gøbel, F. M., Bilde, M., Marsh, A., Reid, J. P., Huisman, A. J., Riipinen, I., Hyttinen, N., Myllys, N., Kurtén, T., Bannan, T., Percival, C. J., & Topping, D. (2018). A reference data set for validating vapor pressure measurement techniques: Homologous series of polyethylene glycols. *Atmospheric Measurement Techniques*, 11(1), 49–63. [https://doi.org/10.5194/amt-](https://doi.org/10.5194/amt-11-49-2018)

95 11-49-2018

Kurtén, T., Hyttinen, N., Louise D’Ambro, E., Thornton, J., & Prisle, N. L. (2018). Estimating the saturation vapor pressures of isoprene oxidation products C<sub>5</sub>H<sub>12</sub>O<sub>6</sub> and C<sub>5</sub>H<sub>10</sub>O<sub>6</sub> using COSMO-RS. *Atmospheric Chemistry and Physics*, 18(23), 17589–17600. <https://doi.org/10.5194/ACP-18-17589-2018>

Li, Z., Buchholz, A., Barreira, L. M. F., Ylisirniö, A., Hao, L., Pullinen, I., Schobesberger, S., & Virtanen, A. (2023). Isothermal evaporation of  $\alpha$ -pinene secondary organic aerosol particles formed under low NO<sub>x</sub> and high NO<sub>x</sub> conditions. *Atmospheric Chemistry and Physics*, 23(1), 203–220. <https://doi.org/10.5194/ACP-23-203-2023>

100

*Scientific Software: Accelerate Your Scientific Innovation / BIOVIA - Dassault Systèmes.* Retrieved April 8, 2025, from <https://www.3ds.com/products/biovia>
